# Supplementary material for: Nacelle power curve measurement with spinner anemometer anduncertainty evaluation
Source: Copernicus journal article supplement (doi:10.5194/wes-2016-29), 2016-09-02

## ***Interactive comment on “Nacelle power curve measurement with spinner anemometer and uncertainty evaluation” by G. Demurtas et al.***

### **Anonymous Referee #1**

Received and published: 29 September 2016

This paper investigates the methods to evaluate the power performance of two wind turbines using spinner anemometers, where power curves of two adjacent wind turbines are measured by means of a common traceable calibrated met-mast and spinner on each turbine. It verifies the feasibility of using the spinner anemometer calibration and nacelle transfer function determined on a reference turbine. It is concluded that power performance measurement with use of spinner anemometer can be made within 0.38% difference in AEP for annual mean wind speed of 8 m/s.

This paper is organized in a good structure, and some following concerns are needed to be modified and clarified:

1. Last sentence in abstract: 0.10% and 0,38%. Please keep them uniformed. 
2. Figure 5: why power (pu) not reach 1 when the wind speed (pu) reaches 1 ? Maybe

[Printer-friendly version](#)

[Discussion paper](#)

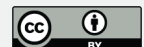

add unit for wind speed, otherwise delete the brackets. 

3. Figure 10: is the unit of y-axis kW ? Please make sure it is a pu value or not. 

---

Interactive comment on Wind Energ. Sci. Discuss., doi:10.5194/wes-2016-29, 2016.

[Printer-friendly version](#)

[Discussion paper](#)

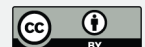

Supplement: Supplementary file [file wes-2016-29-AC1-supplement.pdf]
